# Supplementary material for: Neuronal Differentiation from Induced Pluripotent Stem Cell-Derived Neurospheres by the Application of Oxidized Alginate-Gelatin-Laminin Hydrogels
Source: MDPI journal article supplement (doi:10.3390/biomedicines9030261), 2021-03-05
Supplement: s1 [file s1]

## Supplementary Materials

**Table 1.** Cell culture media compositions utilized for neural induction and differentiation.

| I. Neural induction of hiPSC                                                                                                                                                                                                                                                                                                                                                                                 | II. Neural differentiation                                                                                                                                                                                                                                                                                                     | III. Proliferation                                                                                                                                                                                                             |
|--------------------------------------------------------------------------------------------------------------------------------------------------------------------------------------------------------------------------------------------------------------------------------------------------------------------------------------------------------------------------------------------------------------|--------------------------------------------------------------------------------------------------------------------------------------------------------------------------------------------------------------------------------------------------------------------------------------------------------------------------------|--------------------------------------------------------------------------------------------------------------------------------------------------------------------------------------------------------------------------------|
|                                                                                                                                                                                                                                                                                                                                                                                                              | Basic medium for all steps:<br>DMEM high glucose/Ham's F12 (2:1<br>ratio, #31966-021/#31765-027, Gibco),<br>1 x penicillin/streptomycin (PAN-<br>Biotech),<br>ta                                                                                                                                                               |                                                                                                                                                                                                                                |
| 1 x N2 Supplement (Gibco),<br>1 x B27 supplement (Gibco),<br>20% (v/v) Knockout serum replacement<br>(#10828028, Gibco),<br>16 ng/mL EGF,<br>20 $\mu$ M TGF- $\beta$ RI kinase inhibitor VI<br>(SB-431542, #616461),<br>0.5 $\mu$ M BMP receptor antagonist<br>(LDN-193189, #SML0559,<br>both Sigma-Aldrich, St. Louis, USA).<br><br>[+/- ROCK-inhibitor<br>+/- human FGF – see explanation in<br>main text] | 1 x N2 Supplement (Gibco),<br><br>for hiNPC only supplemented with:<br>1 x B27 supplement (Gibco),<br>100 U/mL Interferon- $\gamma$ ,<br>20 ng/mL neurotrophin-3<br>(both PeproTech, Germany),<br>300 $\mu$ M dibutyryl-cAMP,<br>20 $\mu$ M ascorbic acid,<br>5 mM creatine monohydrate (all Sigma<br>Aldrich, St. Louis, USA) | 1 x B27 supplement (Gibco),<br>20 ng/mL human recombinant<br>epidermal growth factor EGF<br>(#PHG0313, Gibco),<br><br>for hNPC/hiNPC only supplemented<br>with:<br>human recombinant FGF (# 233-FB,<br>20 ng/mL, R&D Systems), |
